# Supplementary material for: Development of a Fragment-Based Screening Assay for the Focal Adhesion Targeting Domain Using SPR and NMR
Source: MDPI journal article supplement (doi:10.3390/molecules24183352), 2019-09-14
Supplement: s1 [file s1]

**Table S1.** NMR experiments measured for human FAT backbone resonance assignments.

| Experiment Number | Experiment Type                                                  | Spectrometer (MHz) |
|-------------------|------------------------------------------------------------------|--------------------|
| 1                 | 1D <sup>1</sup> H                                                | 600                |
| 2                 | 1D <sup>1</sup> H decoupled                                      | 600                |
| 3                 | 1D [ <sup>15</sup> N, <sup>1</sup> H] HSQC T1                    | 600                |
| 4                 | 1D [ <sup>15</sup> N, <sup>1</sup> H] HSQC T2                    | 600                |
| 5                 | 2D [ <sup>15</sup> N, <sup>1</sup> H] HSQC & TROSY               | 600 & 750          |
| 6                 | 2D [ <sup>13</sup> C, <sup>1</sup> H] <i>ct</i> HSQC (aliphatic) | 600 & 750          |
| 7                 | 2D [ <sup>13</sup> C, <sup>1</sup> H] <i>ct</i> HSQC (aromatic)  | 600 & 750          |
| 8                 | 3D HNCO                                                          | 600                |
| 9                 | 3D HN(CA)CO                                                      | 600                |
| 10                | 3D HNCACB                                                        | 600                |
| 11                | 3D CBCACONH                                                      | 600                |
| 12                | 3D HBHACONH                                                      | 600                |
| 13                | 3D [ <sup>1</sup> H]-NOESY-[NH/CH]                               | 600                |

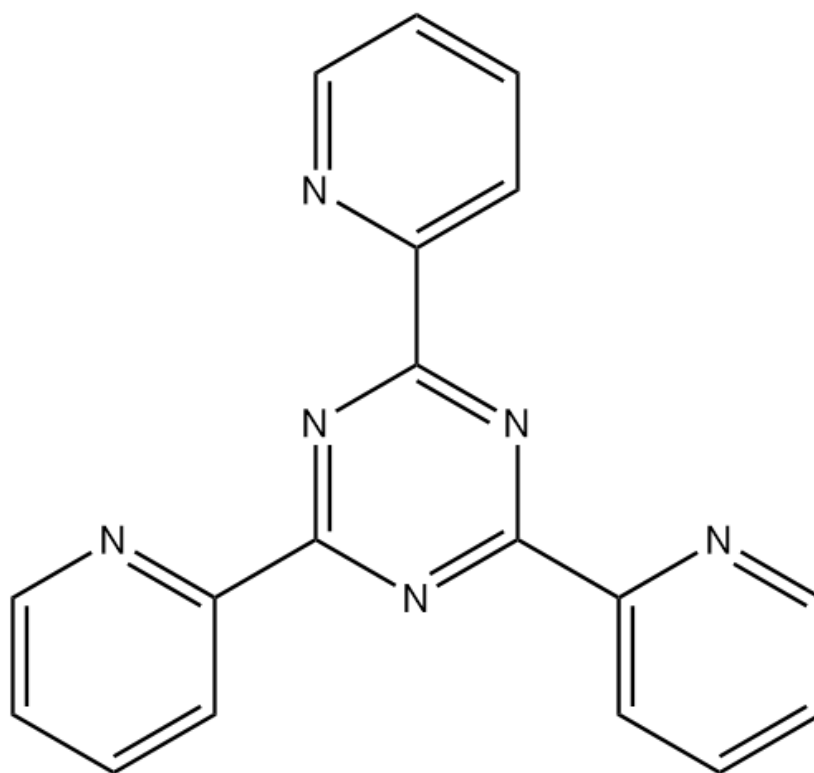

**Figure S1.** Structure of control compound for SPR screening (2,4,6-tri(pyridin-2-yl)-1,3,5-triazine).
